# Supplementary material for: Serum and urine vitamin D metabolite analysis in early preeclampsia
Source: PubMed Central journal article supplement — Endocr Connect. 2017 Dec 7;7(1):199–210. doi: 10.1530/EC-17-0308 (PMC5793806; doi:10.1530/ec-17-0308), 2017-12-07
Supplement: ec-7-199-t001.pdf [file ec-7-199-t001.pdf]

| Compound                  | Abbrev                    | MRM transitions | Collision energy (eV) | Cone Voltage (V) |
|---------------------------|---------------------------|-----------------|-----------------------|------------------|
| 25-hydroxyvitamin D3      | 25OHD3                    | 558.3> 280.5    | 22                    | 26               |
|                           |                           | 558.3> 298.1    | 14                    | 26               |
| 24,25-dihydroxyvitamin D3 | 24,25(OH) <sub>2</sub> D3 | 574.3> 175.3    | 20                    | 22               |
|                           |                           | 574.3> 257.3    | 16                    | 26               |
|                           |                           | 574.3> 298.1    | 20                    | 26               |
| 25-dihydroxyvitamin D3-d3 | 25OHD3-d3                 | 561.4> 283.1    | 23                    | 24               |
|                           |                           | 561.4> 301.3    | 15                    | 24               |

**Supplementary Table 1. Parameters for mass spectrometry analysis of vitamin D metabolites.** Multiple-Reaction Monitoring (MRM) transitions for 4-phenyl-1,2,4-triazoline-3,5-dione (PTAD)-derivatized vitamin D metabolites. Summary of the vitamin D metabolite compounds quantified, their abbreviated term, MRM transitions, collision energy (electronvolt [eV]) and cone voltage (V) .
